# Supplementary material
Source: PubMed Central journal article supplement (PMC3514570)
Supplement: NIHMS420318-supplement-1_si_001.pdf [file NIHMS420318-supplement-1_si_001.pdf]

# Highly efficient binding of paramagnetic beads bioconjugated with 100,000 or more antibodies to protein-coated surfaces

Vigneshwaran Mani, Dhanuka P. Wasalathanthri, Amit A. Joshi, Challa V. Kumar and James F. Rusling\*

E-mail: [james.rusling@uconn.edu](mailto:james.rusling@uconn.edu)

## Supporting Information

**Chemicals and materials.** Ethanolamine-reagent plus, albumin from bovine serum-lyophilized powder, 1-ethyl-3-(3-dimethylaminopropyl) carbodiimide (EDC) and N-hydroxysuccinimide (NHS) were obtained from Sigma-Aldrich. Micro BCA<sup>TM</sup> protein assay kit from ThermoScientific.

**Spectrometer cleaning.** Prior to the start of experiments, SPR spectrometer was cleaned in order to ensure no adsorbed substances in the tubing due to previous experiments. A used sensor chip was placed in the SPR spectrometer, and D. I water was used as running buffer with a flow rate of 200  $\mu\text{L min}^{-1}$ . We then injected in the order of absolute ethanol, 0.5 % (w/v) SDS and 50 mM glycine, pH 9.5 for 5 times with an intermittent D.I water washing step. These steps ensured complete desorption of any adsorbed proteins.

## Steps in protein binding to immobilized primary antibodies ( $\text{Ab}_1$ )

**Antibody immobilization.** Anti-PSA or anti-IL-6 antibody ( $\text{Ab}_1$ ) was immobilized onto activated mSAM coated gold surface using EDC/NHS coupling chemistry. Carboxyl groups on mSAM sensor surface was first activated using 0.4 M/0.1 M EDC/NHS in deionized water at a flow rate of 20  $\mu\text{L min}^{-1}$ . This was followed by the injection of 100  $\mu\text{g mL}^{-1}$  of anti-PSA or anti-IL-6 antibody ( $\text{Ab}_1$  in 10 mM sodium acetate pH 5.0 buffer) at a flow rate of 10  $\mu\text{L min}^{-1}$  for 25 min. During the immobilization of antibody the reference channel was disconnected. After the immobilization, the reference channel was reconnected and excess unreacted activated carboxyl groups were capped using 1 M ethanolamine pH 8.5 at a flow rate of 20  $\mu\text{L min}^{-1}$  for a period of 12.5 min. Reference channel subtraction enabled eliminating any effects due to nonspecific binding and any artifacts. Post conditioning was done using 3 times 6 sec pulse of 100 mM HCl at a flow rate of 100  $\mu\text{L min}^{-1}$  in order to remove non-covalently bound antibodies. At this point PBS-T buffer was injected as a blank buffer (2 times) for a period of time similar to association and dissociation of proteins, which was later used for double referencing of obtained curves.

**Protein binding to immobilized  $\text{Ab}_1$ .** A flow rate of 50  $\mu\text{L min}^{-1}$  for PSA and 100  $\mu\text{L min}^{-1}$  for IL-6 was set using PBS-T as running buffer during the association and dissociation of proteins to immobilized antibody surface. PSA and IL-6 as obtained were diluted in 0.2  $\text{mg mL}^{-1}$  of bovine serum albumin (BSA) in PBS-T buffer at concentrations of 200 nM, 66.6 nM, 22.2 nM, 7.4 nM and 2.5 nM from a 600 nM stock proteins in the order of 3 fold dilution. BSA buffer was used as sample buffer in order to prevent any non-specific binding of protein onto chips or tubing.

Protein binding to Ab<sub>1</sub> surface was allowed for 180s for PSA and 90 s for IL-6. After binding step, 100 mM HCl in D.I water was used to regenerate the surface with 3sec pulse for 3 times at 100  $\mu\text{L min}^{-1}$ . A dissociation rate constant for high affinity antigen-antibody pairs was measured by utilizing longer dissociation times.<sup>1</sup> Extended dissociation of the formed complex for the highest concentration (200 nM) was carried out for 3600 s for protein-Ab<sub>1</sub> complex.

**Binding of protein antigens.** Figures S1 and S2 shows the association and dissociation of PSA or IL-6 onto Ab<sub>1</sub> surface with surface density of  $7.7 \times 10^9$  molecules/ $\text{mm}^2$  (anti-PSA) and  $1.1 \times 10^{10}$  molecules/ $\text{mm}^2$  (anti-IL-6). GraphPad Prism software was used to fit the SPR curves with association and dissociation model as described in main manuscript with eqs 1 and 2 separately. The excellent agreement of the fitted curves (red) and the actual data (black) provides a high degree of confidence. The values of association rate constant  $k_a = 3.70 \pm 0.03 \times 10^5 \text{ M}^{-1}\text{s}^{-1}$ , dissociation rate constant  $k_d = 1.11 \pm 0.02 \times 10^{-3} \text{ s}^{-1}$  and equilibrium dissociation constant  $K_D = 3.0 \pm 0.2 \text{ nM}$  was obtained for PSA binding to anti-PSA Ab<sub>1</sub>.

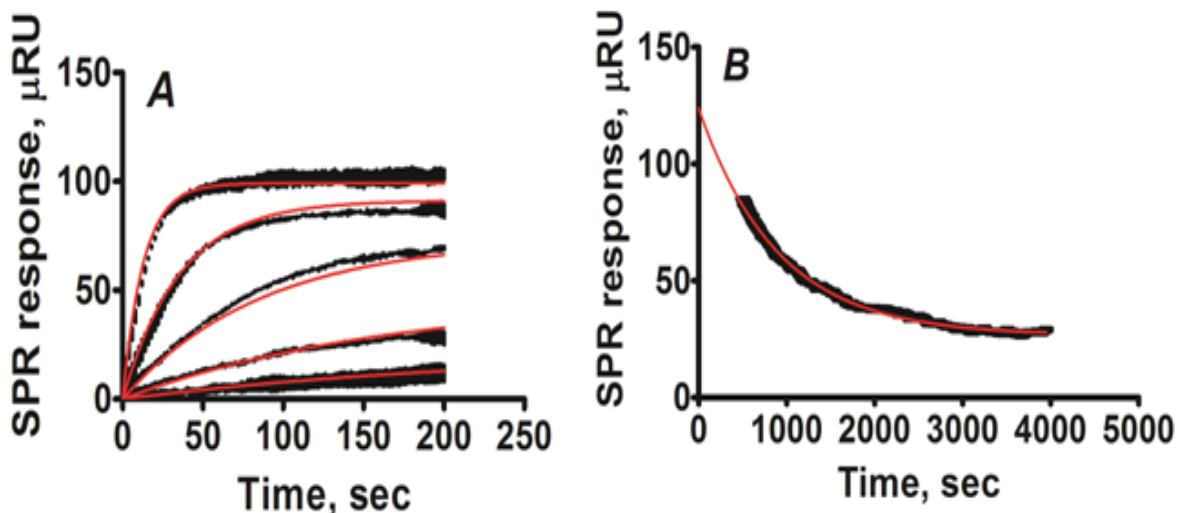

**Figure S1.** A) Association kinetics of series of PSA concentrations (From top-bottom, 200 nM, 66.7 nM, 22.2 nM, 7.4 nM and 2.5 nM) binding to anti- PSA Ab<sub>1</sub> immobilized on a SPR sensor chip at a flow rate of 50  $\mu\text{L min}^{-1}$  (— SPR association response; mean and error, — simulated fit). B) Extended dissociation of formed PSA-Ab<sub>1</sub> complex over a period of 1 hr for 200 nM PSA. (— SPR response, — simulated fit).

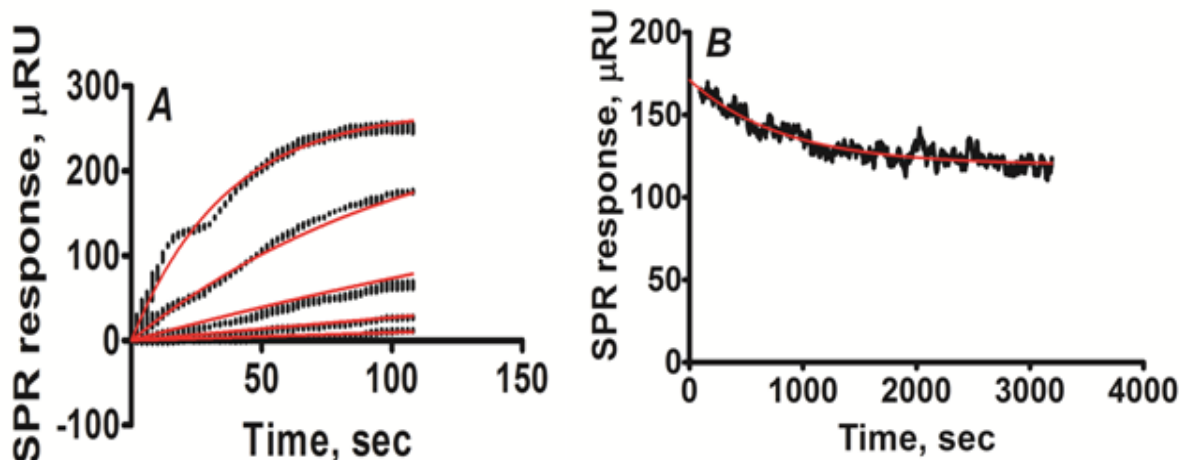

**Figure S2.** A) Association kinetics of series of interleukin-6 concentrations (from top-bottom, 200 nM, 66.6 nM, 22.2 nM, 7.4 nM and 2.5 nM) binding to human IL-6 mAb (primary antibody) immobilized on a SPR sensor chip at a flow rate of  $100 \mu\text{L min}^{-1}$  (— SPR association response; mean and error, — simulated fit). B) Extended dissociation of formed IL-6-primary antibody complex over a period of 1 hr for 200 nM IL-6. (— SPR response, — simulated fit). Double referenced

The values of  $k_a = 1.50 \pm 0.02 \times 10^5 \text{ M}^{-1}\text{s}^{-1}$ ,  $k_d = 1.20 \pm 0.03 \times 10^{-3} \text{ s}^{-1}$  and  $K_D = 8.0 \pm 0.2 \text{ nM}$  were obtained for the IL-6 binding to anti-IL-6 Ab<sub>1</sub>.

**Preparation of MP-Ab<sub>2</sub> conjugates.** MP-Ab<sub>2</sub> was prepared according to our previous study. In the first step,  $20 \mu\text{L}$  of tosylated magnetic particles ( $100 \text{ mg mL}^{-1}$ ) were magnetically washed with  $1 \text{ mL}$  of  $100 \text{ mM}$  pH 9.5 sodium borate buffer for two times. The magnetically separated particles were incubated with mixture of  $207 \mu\text{L}$   $3 \text{ M}$  ammonium sulphate in  $100 \text{ mM}$  pH 9.5 sodium borate buffer,  $340 \mu\text{L}$  of pH 9.5 sodium borate buffer and  $80 \mu\text{L}$  of  $1 \text{ mg mL}^{-1}$  of either anti-PSA antibody (Ab<sub>2</sub>) or anti-IL-6 antibody (Ab<sub>2</sub>) in PBS-T buffer in a  $1 \text{ mL}$  eppendorf vial. This mixture was rotated at  $37 \text{ }^\circ\text{C}$  in a mixer with slow rotation for a period of 24 hr. Magnetic particle conjugates thus formed were separated using magnet and  $625 \mu\text{L}$  of  $0.5 \%$  BSA in PBS-T pH 7.4 was used to passivate and block any free functional tosyl groups for overnight. BSA blocked magnetic particle antibody conjugates (MP-Ab<sub>2</sub>) were washed using  $0.1 \%$  BSA in PBS-T for 4 times and  $625 \mu\text{L}$  of  $0.1 \%$  BSA buffer was added, which was considered as stock solution for the SPR assay, and stored at  $4 \text{ }^\circ\text{C}$  before use.

**Micro bicinchoninic acid ( $\mu\text{BCA}$ )<sup>2</sup> protein assay kit.** The amount of Ab<sub>2</sub>s coupled to magnetic particles (MP) in each concentrations of MP-Ab<sub>2</sub> conjugates were estimated using protein  $\mu\text{BCA}$  assay kit. MP-Ab<sub>2</sub> prepared without BSA blocking step were used for antibody estimation in order to avoid BSA protein in the  $\mu\text{BCA}$  protein assay kit. MP-Ab<sub>2</sub> stock was first diluted 8.2 times, which was followed by series of 2-fold dilutions to obtain different concentrations. Similarly MP without secondary antibodies of same stock concentration was diluted to obtain different concentrations which acted as a control. The  $450 \mu\text{L}$  of MP-Ab<sub>2</sub> solution was mixed with  $450 \mu\text{L}$  of BCA reagent and reacted for 1 h at  $60 \text{ }^\circ\text{C}$  in a water bath. Similar reaction condition was used for MP without Ab<sub>2</sub> as a control. In this reaction  $\text{Cu}^{+2}$  present in BCA

reagent undergoes reduction to form  $\text{Cu}^{+1}$  in the presence of protein.  $\text{Cu}^{+1}$  thus formed chelates between 2 BCA molecules to give a characteristic absorbance at 562 nm corresponding to protein concentration. The supernatant solution obtained after applying magnetic field was used to determine absorbance at 562 nm for MP-Ab<sub>2</sub> and MP (Figure S3). The measured absorbance from each concentration of MP was subtracted from MP-Ab<sub>2</sub> to estimate concentration of Ab<sub>2</sub> present in MP-Ab<sub>2</sub> solution. The subtracted absorbance values at 562 nm of Ab<sub>2</sub> on MP were then correlated to linear calibration of standard antibody Ab<sub>2</sub> concentrations estimated using  $\mu\text{BCA}$  protein assay kit (Figure S4). From this, the concentration of Ab<sub>2</sub> in each MP-Ab<sub>2</sub> was accurately determined by this method for anti-PSA Ab<sub>2</sub> and anti-IL-6 Ab<sub>2</sub>. The no. of antibodies bound per magnetic particle was determined to be  $1.23 \pm 0.12 \times 10^5$  for anti-PSA Ab<sub>2</sub> per MP and  $1.22 \pm 0.08 \times 10^5$  for anti-IL-6 Ab<sub>2</sub> per MP.

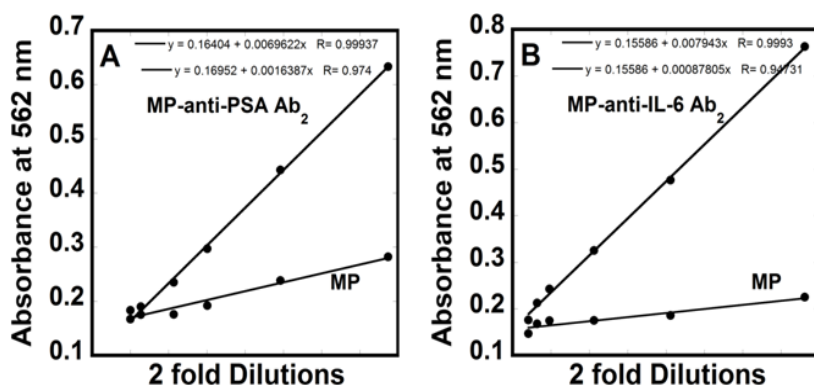

**Figure S3.**  $\mu\text{BCA}$  absorbance response for increasing concentration of MP-Ab<sub>2</sub> and MP at 2-fold dilutions in PBS for A) anti-PSA Ab<sub>2</sub> B) anti-IL-6 Ab<sub>2</sub>

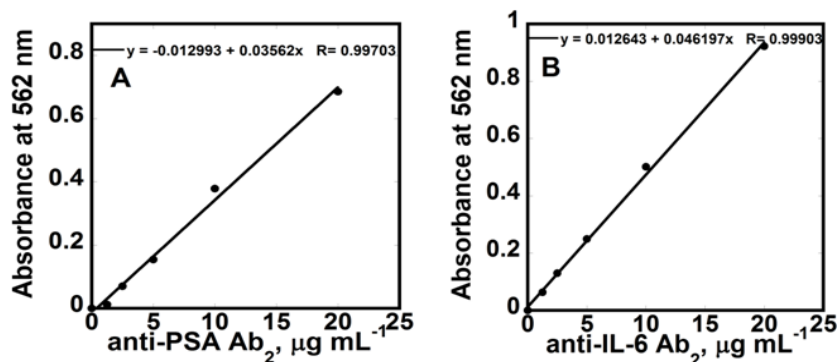

**Figure S4.**  $\mu\text{BCA}$  protein assay for A) standard pure anti-PSA Ab<sub>2</sub> B) standard pure anti-IL-6 Ab<sub>2</sub>

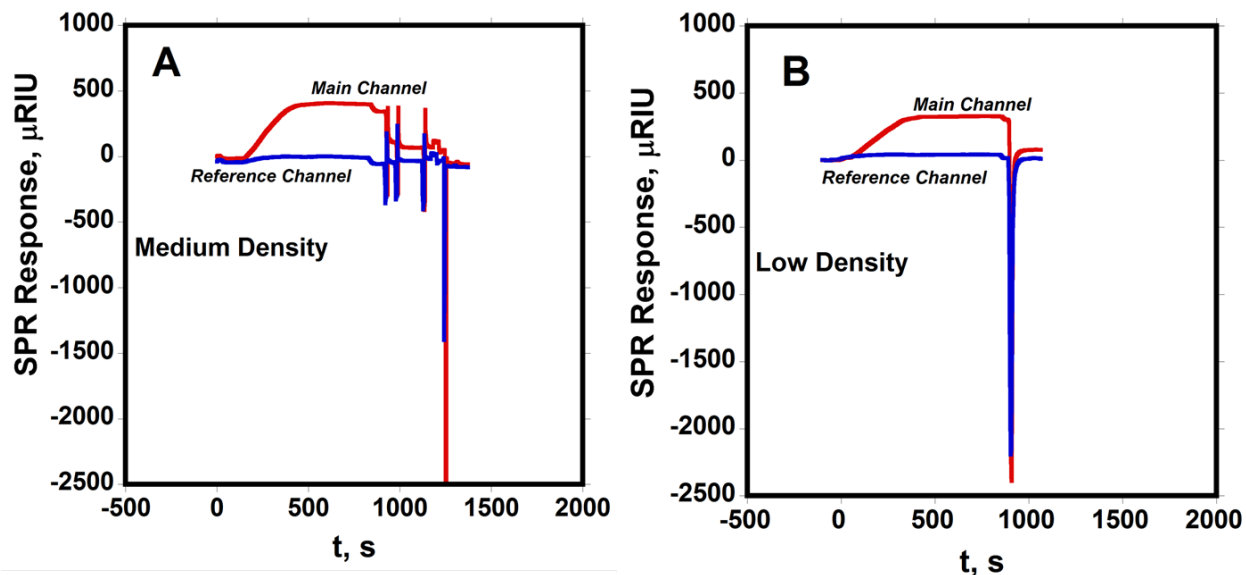

**Figure S5.** SPR response of detachment of bound particles from A) immobilized PSA (medium density); with total antibody concentration of 67.4 nM B) immobilized IL-6 (low density); with total antibody concentration of 76.1 nM using repeated pulses of 100 mM HCl at a flow rate of  $100 \mu\text{L min}^{-1}$ .

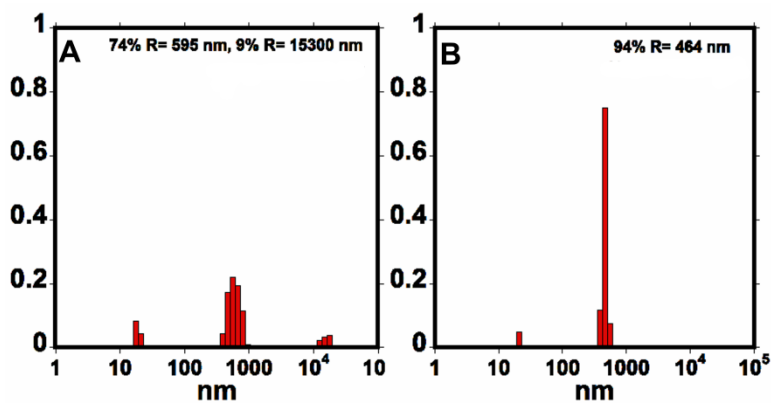

**Figure S6.** Dynamic light scattering showing the size distribution of offline captured PSA (5 pg/mL) A) by a MP-Ab<sub>2</sub> B) Silica Particles-Ab<sub>2</sub> in PBS-T buffer pH 7.0.

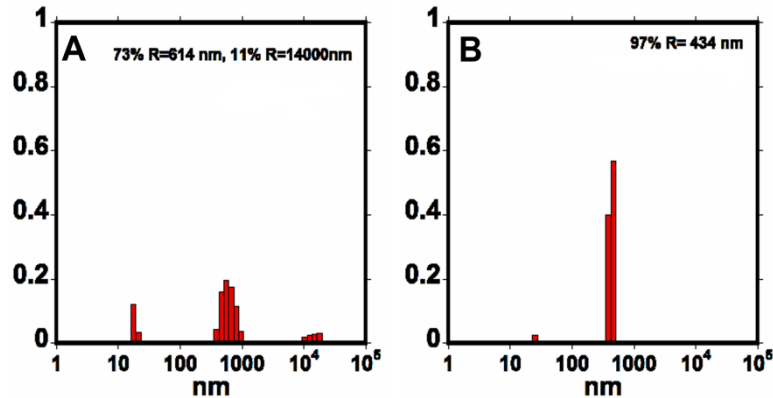

**Figure S7.** Dynamic light scattering showing the size distribution of A) MP-Ab<sub>2</sub> and B) Silica Particles-Ab<sub>2</sub> with no bound PSA antigen.

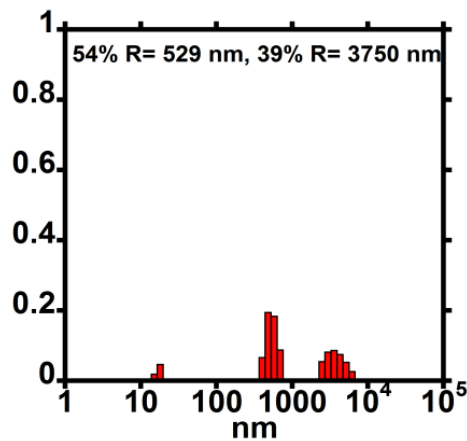

**Figure S8.** Dynamic light scattering showing the size distribution of tosyl MP without conjugated Ab<sub>2</sub> in 100 mM borate buffer pH 9.5.

### References:

- 
- (1) Drake, A. W.; Myszka, D. G.; Klakamp, S. L. *Anal. Biochem.* **2004**, *328*, 35-43.
  - (2) Smith, P. K.; Krohn, R. I.; Hermanson, G. T.; Mallia, A. K.; Gartner, F. H.; Provenzano, M. D.; Fujimoto, E. K.; Goeke, N. M.; Olson, B. J.; Klenk, D.C.; *Anal. Biochem.* **1985**, *150*, 76-85.
